# Supplementary material for: Comparison of molecularly imprinted plasmonic nanosensor performances for bacteriophage detection
Source: Royal Society of Chemistry journal article supplement (doi:10.1039/d0nj04053c), 2020-01-01

Electronic Supplementary Material (ESI) for New Journal of Chemistry.

This journal is © The Royal Society of Chemistry and the Centre National de la Recherche Scientifique

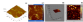

Supplement: d0nj04053c2.pdf [file d0nj04053c2.pdf]
