# Supplementary material for: Comparison of molecularly imprinted plasmonic nanosensor performances for bacteriophage detection
Source: Royal Society of Chemistry journal article supplement (doi:10.1039/d0nj04053c), 2020-01-01
Supplement: d0nj04053c10.pdf [file d0nj04053c10.pdf]

## Comparison of Molecularly Imprinted Plasmonic Nanosensors Performances for Bacteriophage Detection

Özgecan Erdem<sup>1</sup>, Nilüfer Cihangir<sup>1</sup>, Yeşeren Saylan<sup>2</sup> and Adil Denizli<sup>2\*</sup>

<sup>1</sup>Hacettepe University, Department of Biology, 06800, Ankara, Turkey

<sup>2</sup>Hacettepe University, Department of Chemistry, 06800, Ankara, Turkey

### Supplementary file

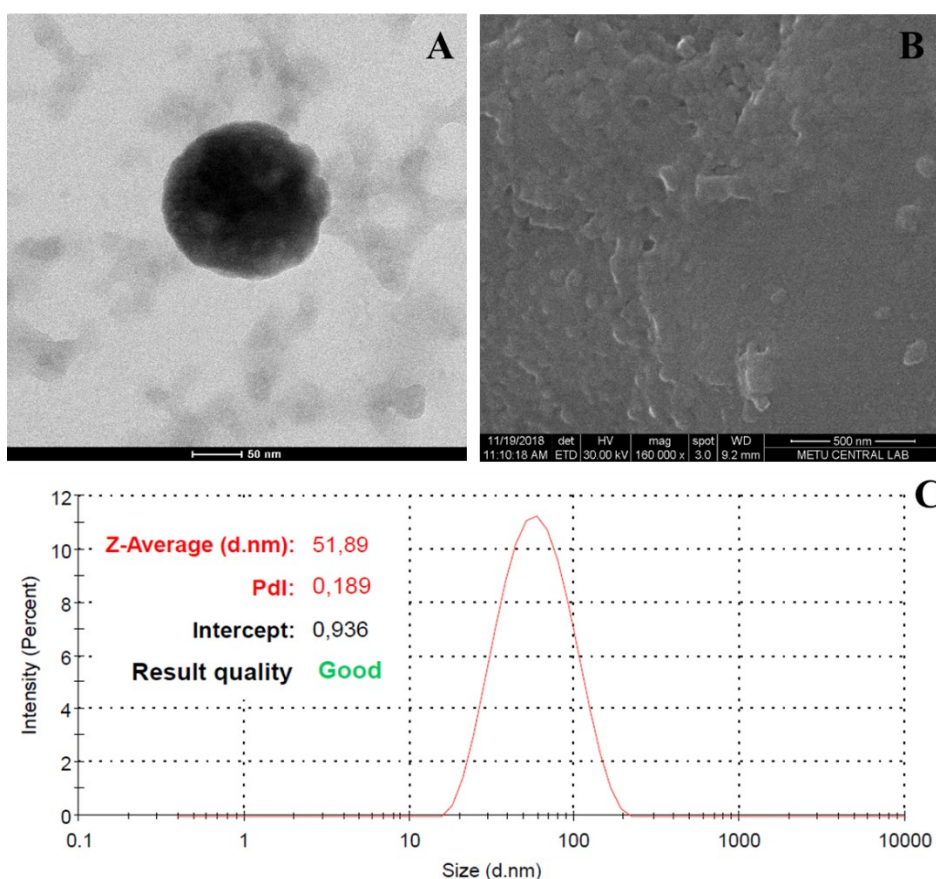

**Fig. S1** TEM (A), SEM images (B), and size distribution (C) of non-imprinted nanoparticles.

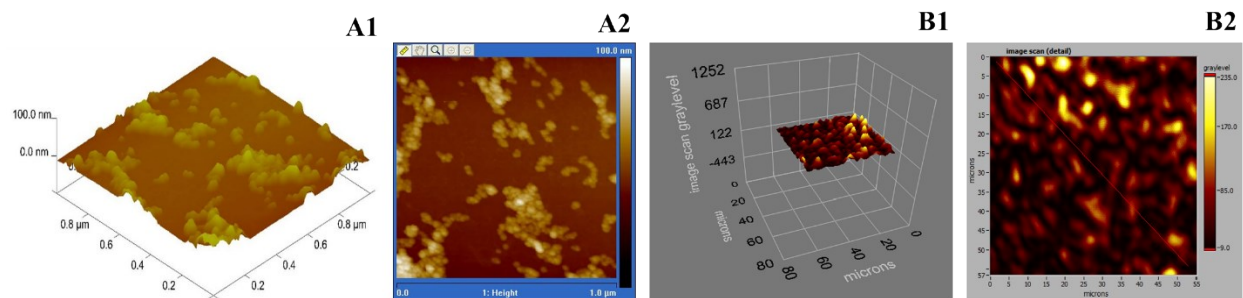

**Fig. S2** Three- and two-dimensional AFM (A) and ellipsometry (B) images of non-imprinted nanoparticle-based plasmonic nanosensor.

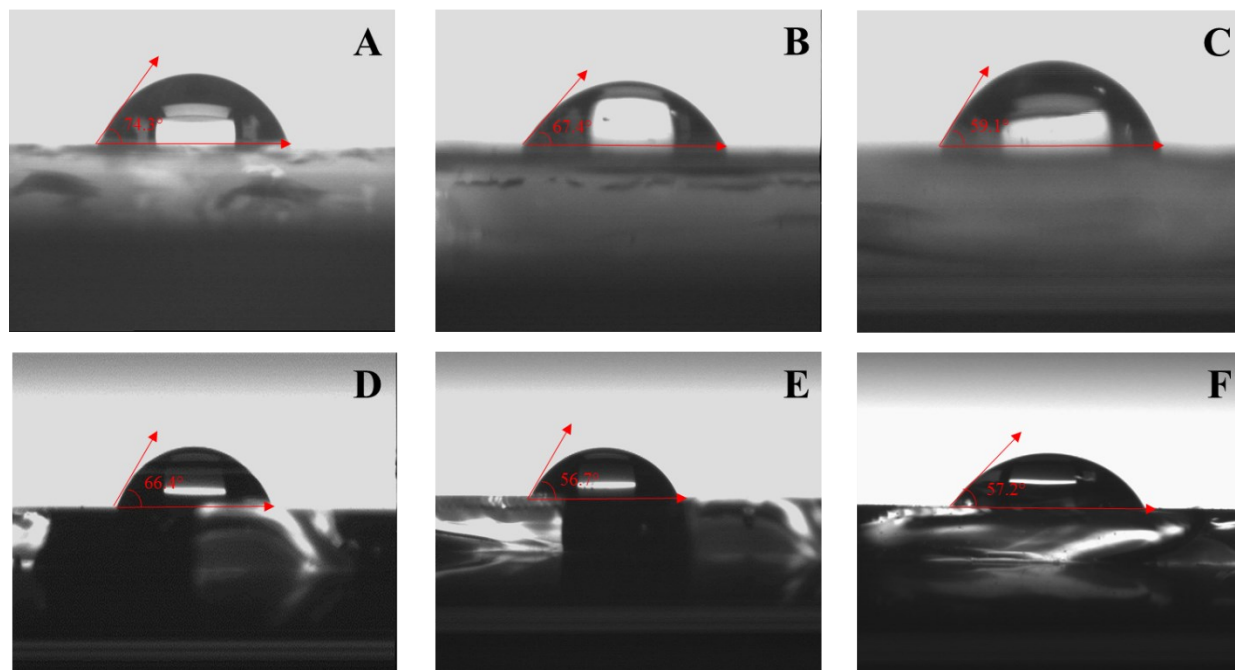

**Fig. S3** Contact angle images of nanoparticle- (A: non-modified, B: non-imprinted and C: imprinted) and nanofilm- (D: modified, E: non-imprinted, F: imprinted) based plasmonic nanosensors.

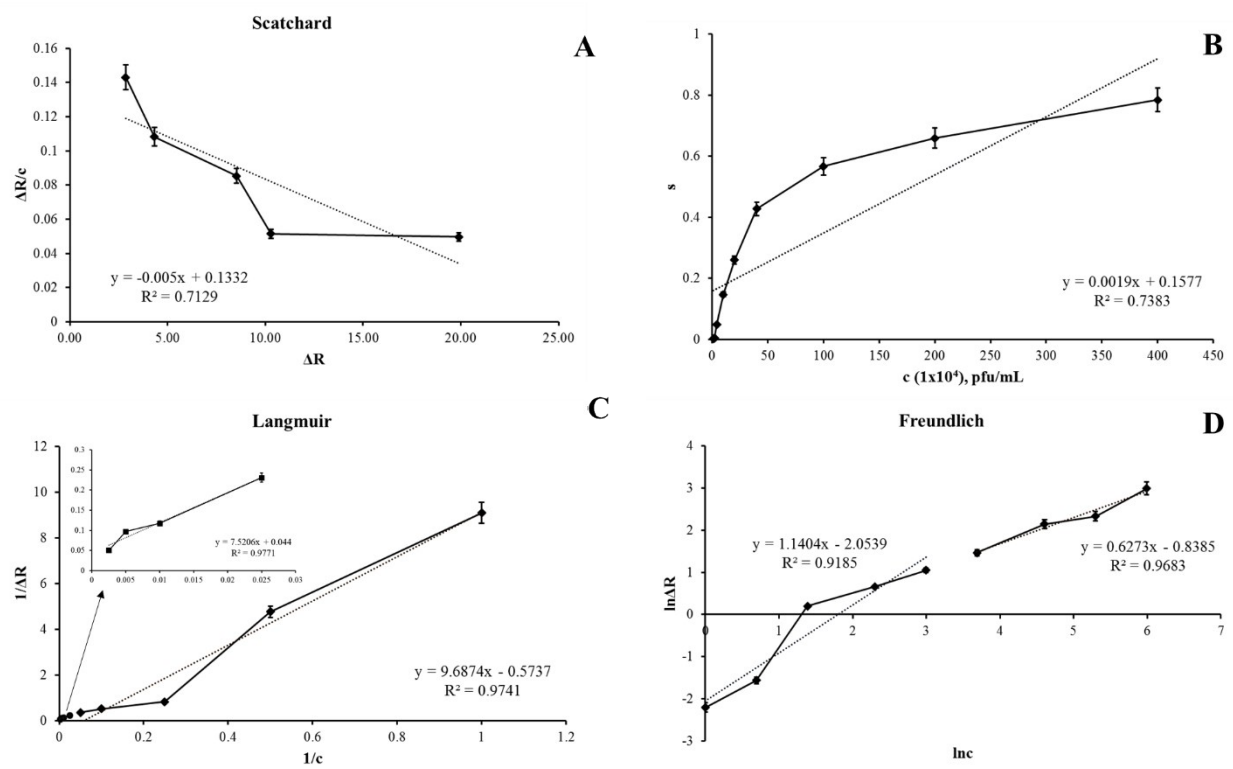

**Fig. S4** Adsorption isotherm models for nanoparticle-based plasmonic nanosensor (A: Scatchard; B: Association; C: Langmuir and D: Freundlich).

**Table S1.** Binding parameters for nanoparticle-based plasmonic nanosensor.

| Scatchard            |       | Association                                   |       |
|----------------------|-------|-----------------------------------------------|-------|
| $\Delta R_{\max}$    | 26.64 | $k_a, \text{pfu/mL}^{-1} \cdot \text{s}^{-1}$ | 0.002 |
| $K_A, \text{mL/pfu}$ | 0.005 | $k_d, \text{s}^{-1}$                          | 0.158 |
| $K_D, \text{pfu/mL}$ | 200   | $K_A, \text{mL/pfu}$                          | 0.012 |
| $R^2$                | 0.71  | $K_D, \text{pfu/mL}$                          | 83.0  |
|                      |       | $R^2$                                         | 0.74  |

**Table S2.** Kinetic parameters for nanoparticle-based plasmonic nanosensor.

| Langmuir          |       | Freundlich        |      |
|-------------------|-------|-------------------|------|
| $\Delta R_{\max}$ | 22.73 | $\Delta R_{\max}$ | 2.31 |
| $K_D$ , pfu/mL    | 170.9 | $1/n$             | 0.63 |
| $K_A$ , mL/pfu    | 0.006 | $R^2$             | 0.92 |
| $R^2$             | 0.98  |                   |      |

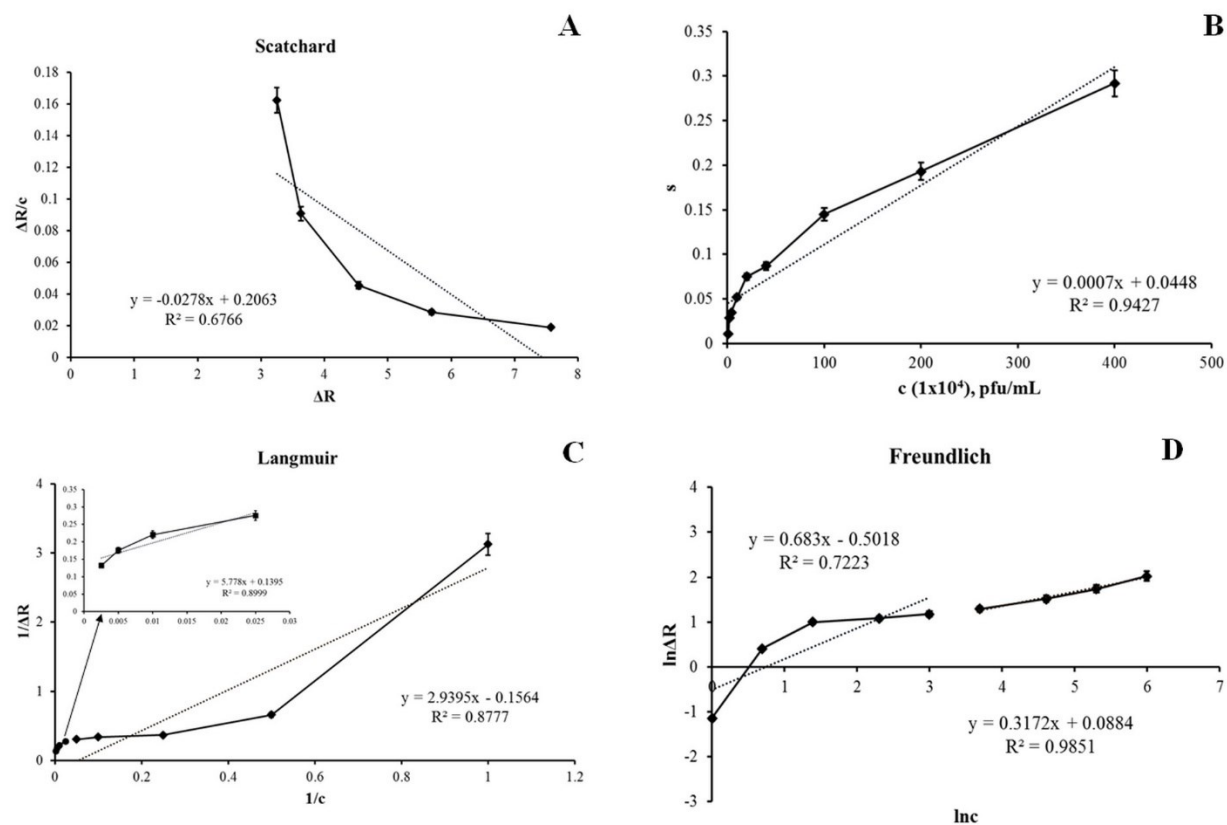

**Fig. S5** Adsorption isotherm models for nanofilm-based plasmonic nanosensor (A: Scatchard; B: Association; C: Langmuir and D: Freundlich).

**Table S3.** Binding parameters for nanofilm-based plasmonic nanosensor.

| Scatchard            |      | Association                                   |       |
|----------------------|------|-----------------------------------------------|-------|
| $\Delta R_{\max}$    | 7.42 | $k_a, \text{pfu/mL}^{-1} \cdot \text{s}^{-1}$ | 0.001 |
| $K_A, \text{mL/pfu}$ | 0.03 | $k_d, \text{s}^{-1}$                          | 0.045 |
| $K_D, \text{pfu/mL}$ | 36.0 | $K_A, \text{mL/pfu}$                          | 0.02  |
| $R^2$                | 0.68 | $K_D, \text{pfu/mL}$                          | 64.0  |
|                      |      | $R^2$                                         | 0.94  |

**Table S4.** Kinetic parameters for nanoparticle-based plasmonic nanosensor.

| Langmuir             |      | Freundlich        |      |
|----------------------|------|-------------------|------|
| $\Delta R_{\max}$    | 7.17 | $\Delta R_{\max}$ | 1.09 |
| $K_D, \text{pfu/mL}$ | 41.4 | $1/n$             | 0.32 |
| $K_A, \text{mL/pfu}$ | 0.03 | $R^2$             | 0.72 |
| $R^2$                | 0.90 |                   |      |

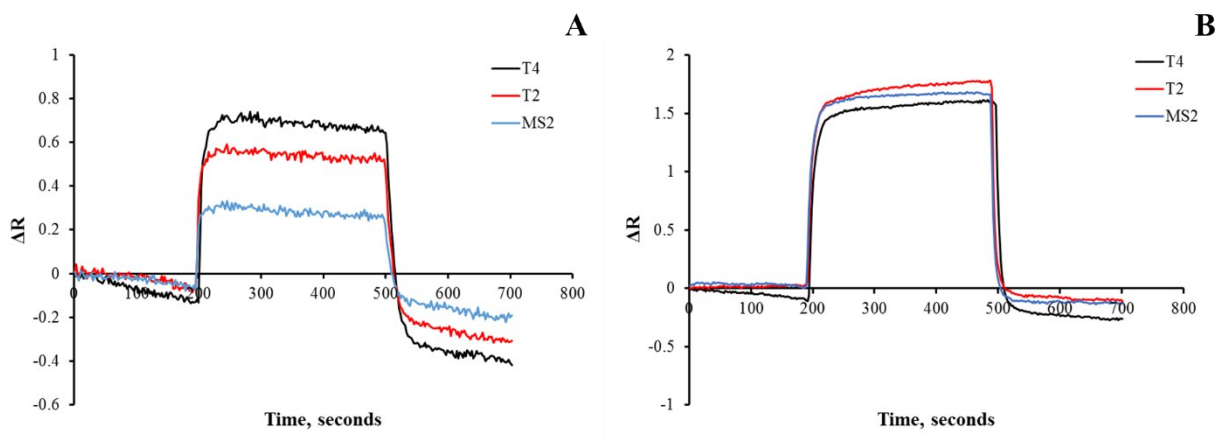

**Fig. S6** Selectivity studies of non-imprinted nanoparticle- (A) and nanofilm- (B) based plasmonic nanosensors.

**Table S5.** Selectivity and relative selectivity of nanoparticle- (A) and nanofilm- (B) based plasmonic nanosensors.

| <b>A</b> | <b>Imprinted</b> | <b>k</b> | <b>Non-imprinted</b> | <b>k</b> | <b>k'</b> |
|----------|------------------|----------|----------------------|----------|-----------|
| T4       | 19.89            |          | 0.68                 |          |           |
| T2       | 3.82             | 5.21     | 0.53                 | 1.28     | 4.07      |
| MS2      | 3.61             | 5.51     | 0.26                 | 2.62     | 2.11      |
| <b>B</b> |                  |          |                      |          |           |
| T4       | 7.57             |          | 1.61                 |          |           |
| T2       | 2.51             | 3.02     | 1.77                 | 0.91     | 3.32      |
| MS2      | 1.88             | 4.03     | 1.67                 | 0.96     | 4.21      |

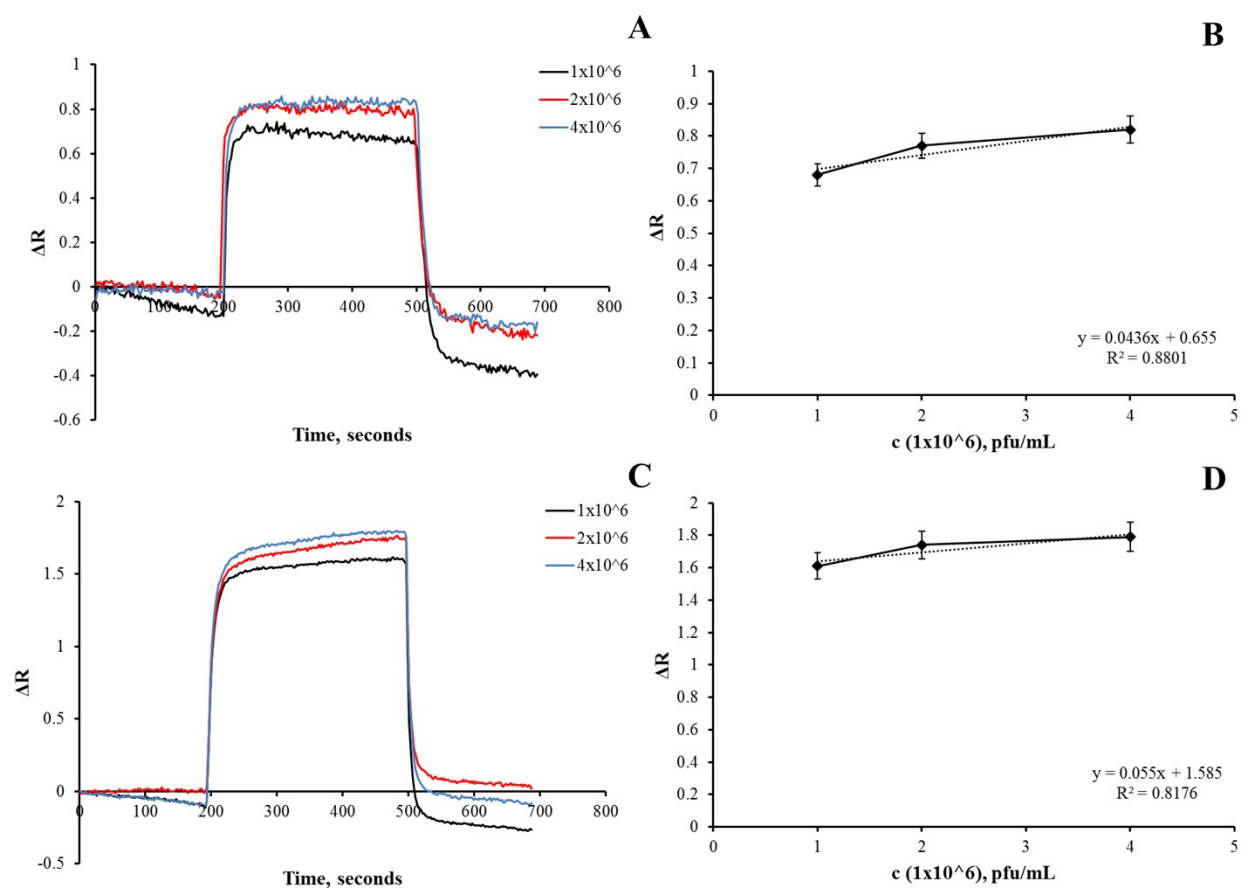

**Fig. S7** Real-time bacteriophage detection and the corresponding relationship between the change of reflectivity and bacteriophage concentration for non-imprinted nanoparticle- (A, B) and nanofilm- (C, D) based plasmonic nanosensors.

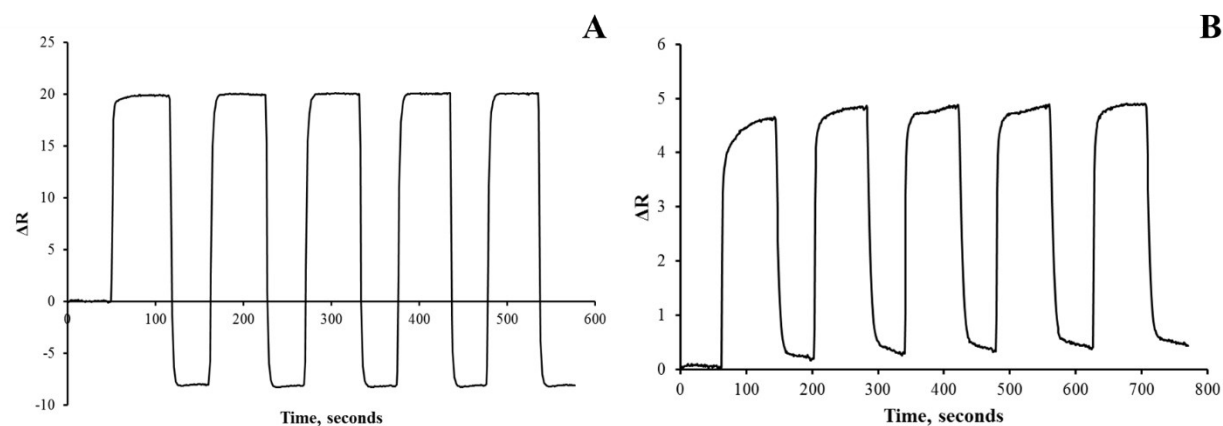

**Fig. S8** Reusability studies of nanoparticle- (A) and nanofilm- (B) based plasmonic nanosensors.

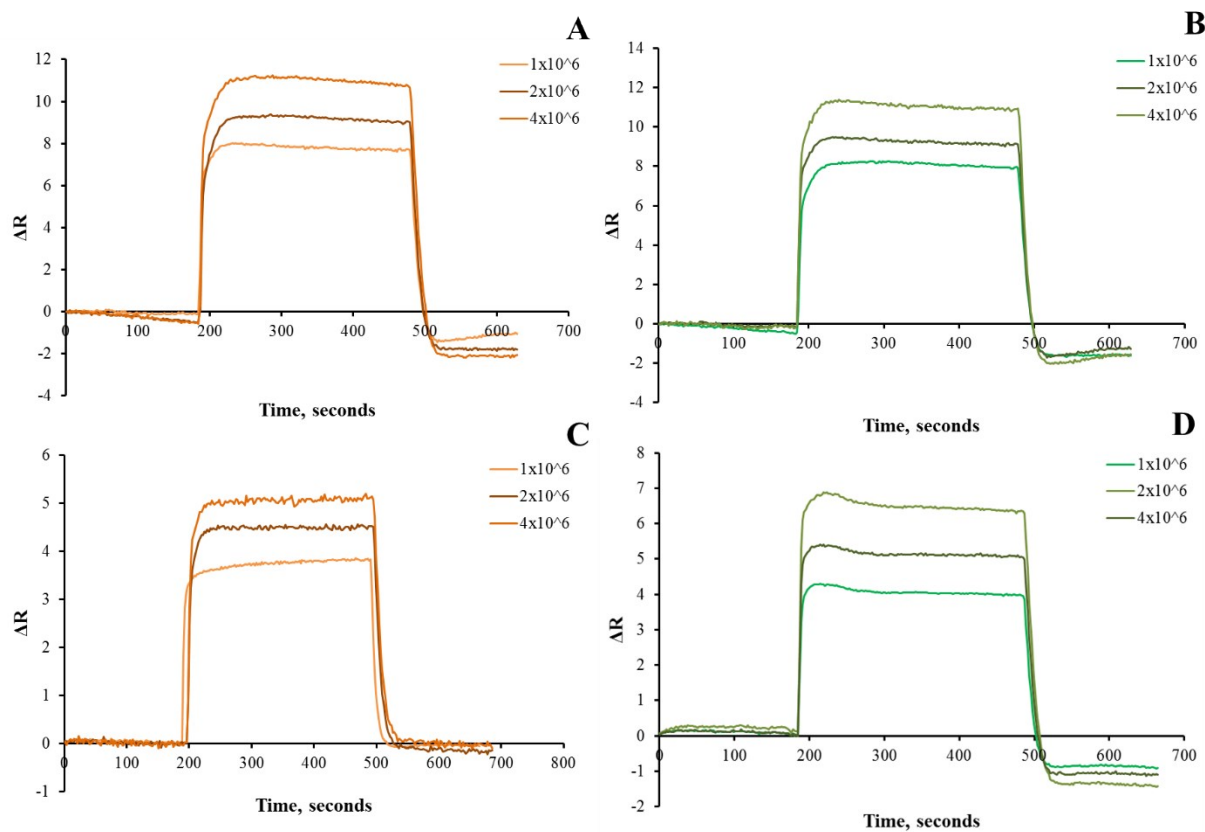

**Fig. S9** Water (tap and sea) sample analysis of nanoparticle- (A, B) and nanofilm- (C, D) based plasmonic nanosensors in different bacteriophage concentration.
