# Supplementary figures and images for: Comparison of molecularly imprinted plasmonic nanosensor performances for bacteriophage detection
Source: Royal Society of Chemistry journal article supplement (doi:10.1039/d0nj04053c), 2020-01-01

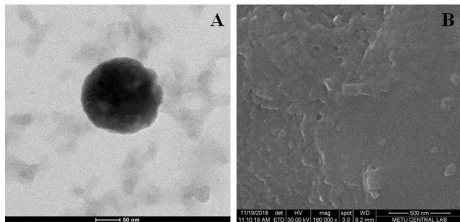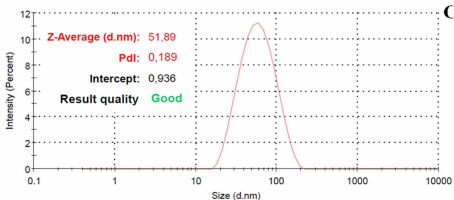

Supplement: d0nj04053c1.pdf [file d0nj04053c1.pdf]

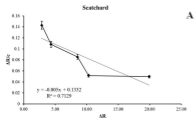

**A**

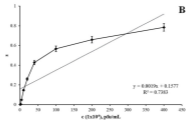

**B**

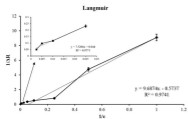

**C**

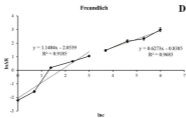

**D**

Supplement: d0nj04053c4.pdf [file d0nj04053c4.pdf]

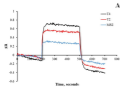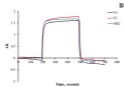

Supplement: d0nj04053c6.pdf [file d0nj04053c6.pdf]

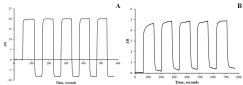

Supplement: d0nj04053c8.pdf [file d0nj04053c8.pdf]

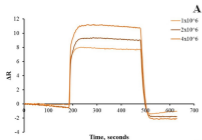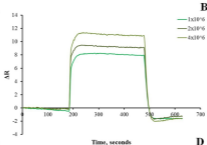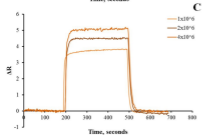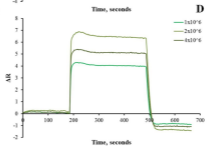

Supplement: d0nj04053c9.pdf [file d0nj04053c9.pdf]
